# Supplementary material for: Abnormal CD8 T cells induce and track Alzheimer’s-like neurodegeneration
Source: Research Square preprint supplement (doi:10.21203/rs.3.rs-199647/v1), 2021-02-26
Supplement: Supplementary file 1 [file 4e3ce52f5f7031f588c0f917.docx]

Supplemental Information for

**Abnormal CD8 T cells induce and track Alzheimer’s-like neurodegeneration**

Akanksha Panwar, Altan Rentsendorj, Michelle Jhun, Robert M. Cohen, Ryan Cordner, Nicole Yeager, Robert N. Pechnick, Gretchen Duvall, Armen Mardiros, David Golchian, Hanna Schubloom, Lee-Way Jin, Debbie Van Dam, Yannick Vermeiren, Hans De Reu, Peter Paul De Deyn, Keith L. Black, and Christopher J. Wheeler*

*Correspondence to: chris@tneuropharma.com

**This file includes:**

Table S1

**Table S1**

| **HOST** | **ANALYSIS** | **Brain Region/Method** | **EXPERIMENTAL GROUP “n”** | | | | **VALIDATION** |
| --- | --- | --- | --- | --- | --- | --- | --- |
| **PBS** | **wt-CD8** | **PrfKO-CD8** | **IfnKO-CD8** |
| **B6.Foxn1** | CD8 | Cortex | 10 | 11 | 9 | 6 | WB, IHC morphology (Ref 7) |
| Hippo | 11 | 12 | 3 | 6 |
| GFAP | Cortex | 10 | 19 | 10 | 6 | WB, IHC morphology (Ref 7) |
| Hippo | 9 | 14 | 7 | 6 |
| Iba1 | Cortex | 3 | 5 | 3 | 5 | IHC morphology  (Ref 7) |
| Hippo | 4 | 4 | 3 | 3 |
| A (10 wk) | 1-40 | 4 | 9 | NA | NA | NA |
| 1-42 | 4 | 9 | NA | NA |
| A (15 mos) | 1-40 | 4 | 7 | 3 | 3 |
| 1-42 | 8 | 14 | 6 | 6 |
| 4G8 IHC | Cng ctx | 7 | 11 | 6 | 8 | WB (absorbed), IHC morphology, huAD IHC |
| Hippo | 6 | 11 | 5 | 8 |
| Ent ctx | 4 | 10 | 6 | 8 |
| pTau/PHF | 10 wk | 7 | 11 | NA | NA | WB, IHC morphology, huAD IHC |
| 15 mos | 4 | 7 | 6 | 5 |
| Gallyas | Cng ctx | 7 | 15 | 5 | 9 | IHC morphology, huAD IHC |
| Hippo | 7 | 13 | 6 | 19 |
| Ent ctx | 19 | 19 | 5 | 10 |
| NeuN | WB | 8 | 8 | 6 | 6 | WB, IHC morphology |
| counts | 4 | 6 | 3 | 3 |
| Drebrin WB | forebrain | 4 | 4 | 3 | 3 | WB, IHC morphology |
| Brain wt | 6 mos | 5 | 5 | NA | NA | NA |
| 15 mos | 4 | 8 | 7 | 7 |
| Open Field | 3 mos | 10 | 21 | 10 | 10 |
| 6 mos | 10 | 15 | 10 | 10 |
| 13 mos | 7 | 10 | 10 | 10 |
| Fear Cond | 6 mos | 8 | 11 | NA | NA |
| 11 mos | 16 | 15 | NA | NA |
| Spont Alt | 12 mos | 7 | 17 | 10 | 10 |
| Barnes Maze |  | 14 | 12 | 10 | 9 |
|  | | | **normal** | **mild AD** | **severe AD** |  | |
| **Human** | microarray |  | 9 | 13 | 7 |  | GFAP normalization |
| Prf1 protein |  | 5 | 4 | 10 |  | WB, huAD IHC |
| pHLA/APP  +anti-CD8 |  | 10 | NA | 10 |  | IHC morph, co-staining |

**Group numbers and validation**. Validation: WB = Western blot; morph = expected morphology obtained on tissue staining; WB(absorb) = expected positive signal by Western blot with negative antigen-absorbed control; huAD = additional expected morphology obtained on brain tissue from human AD patients; co-staining = stained with 2nd cell-type-specific reagent, (anti-CD8 antibody).
